# Supplementary material for: Opposing p53 and mTOR/AKT promote an in vivo switch from apoptosis to senescence upon telomere shortening in zebrafish
Source: eLife. 2020 May 19;9:e54935. doi: 10.7554/eLife.54935 (PMC7237213; doi:10.7554/eLife.54935)
Supplement: Figure 1—figure supplement 2—source data 1. [file elife-54935-fig1-figsupp2-data1.xlsx]

## Sheet: Foglio1
	real-time qPCR Bcl-XL normalized on RPL13
		3 month-old							9month-old
	TISSUE	GENOTYPE	AGE	FISH	DCT			TISSUE	GENOTYPE	AGE	FISH	DCT
	GUT	WT	3 month-old	1	1.091			GUT	WT	9month-old	1	1.301
				2	1.064						2	0.836
				3	0.861						3	0.92
				4	1.029						4	0.976
				5	1.142						5	1.007
				6	0.851						6	1.017
		tert-/-	3 month-old	1	0.897				tert-/-	9month-old	1	1.028
				2	1.304						2	2.297
				2	1.127						2	1.952
				4	0.878						4	1.378
				5	0.856						5	3.406
				6	1.06						6	3.982
	TISSUE	GENOTYPE	AGE	FISH	DCT			TISSUE	GENOTYPE	AGE	FISH	DCT
	TESTIS	WT	3 month-old	1	1.72			TESTIS	WT	9month-old	1	2.052
				2	1.045						2	1.511
				3	0.557						3	0.323
				4	0.801						4	0.694
				5	0.942						5	2.483
				6	1.326						6	0.58
		tert-/-	3 month-old	1	0.722				tert-/-	9month-old	1	5.668
				2	0.682						2	4.033
				2	1.066						2	10.575
				4	1.179						4	3.941
				5	1.098						5	19.475
				6	1.639
