# Supplementary material for: Opposing p53 and mTOR/AKT promote an in vivo switch from apoptosis to senescence upon telomere shortening in zebrafish
Source: eLife. 2020 May 19;9:e54935. doi: 10.7554/eLife.54935 (PMC7237213; doi:10.7554/eLife.54935)
Supplement: Figure 1—source data 1. [file elife-54935-fig1-data1.xlsx]

## Sheet: Foglio1
QUANTIFICATION TUNEL and p16 positive cells in GUT
chosen at least 2 picture for each slide and zoomed in counting nuclei DAPI+ and p16+, done for at least 2 parts
considered cells with at least 50% of the nucleus stained for p16
		3 month-old							9 month-old
		GENOTYPE	AGE	FISH	% TUNEL cells / tot DAPI cells			GENOTYPE	AGE	FISH	% TUNEL cells / tot DAPI cells
		WT	3 month-old	1	3.4239			WT	9 month-old	1	4.21414
				2	1.45312					2	0.584795
				2	1.37469					2	2.34728
				4	3.912
		tert-/-	3 month-old	1	16.1151			tert-/-	9 month-old	1	2.9453
				2	11.2319					2	4.84497
				2	10.0932					2	4.40748
				4	19.567
		GENOTYPE	AGE	FISH	% p16 cells / tot DAPI cells			GENOTYPE	AGE	FISH	% p16 cells / tot DAPI cells
		WT	3 month-old	1	1.55017			WT	9 month-old	1	21.59				29.413
				2	0.680234					2	18.8083				33.0737
				2	0.0511823					2	20.9449				57.9429
				4	1.76542					4	12.3927				28.2689
				5	10.6304										35.3319
		tert-/-	3 month-old	1	2.33876			tert-/-	9 month-old	1	29.413
				2	1.25491					2	33.0737
				2	3.12711					2	57.9429
				4	1.99139					4	28.2689
				5	10.7369					5	35.3319
