# Supplementary material for: Opposing p53 and mTOR/AKT promote an in vivo switch from apoptosis to senescence upon telomere shortening in zebrafish
Source: eLife. 2020 May 19;9:e54935. doi: 10.7554/eLife.54935 (PMC7237213; doi:10.7554/eLife.54935)
Supplement: Figure 1—source data 2. [file elife-54935-fig1-data2.xlsx]

## Sheet: Foglio1
QUANTIFICATION TUNEL and p16 positive cells in TESTIS
		3 month-old							6-9 month-old
		GENOTYPE	AGE	FISH	% TUNEL cells / tot DAPI cells			GENOTYPE	AGE	FISH	% TUNEL cells / tot DAPI cells
		WT	3 month-old	1	3.9			WT	6-9 month-old	1	13.89
				2	2					2	2.708
				2	0					3	2.391
				4	11.0956					4	1
										5	1.2
										6	14.5917
		tert-/-	3 month-old	1	10.9
				2	14.5			tert-/-	6-9 month-old	1	13.71
				2	11.4					2	5.902
				4	24.7733					2	13.1
				5	11.3788					4	17.024
				6	25.1301
		GENOTYPE	AGE	FISH	% p16 cells / tot DAPI cells			GENOTYPE	AGE	FISH	% p16 cells / tot DAPI cells
		WT	3 month-old	1	10.1179			WT	6-9 month-old	1	13.86				29.413
				2	3.663					2	16.7607				33.0737
				3	7.74908					2	11.2121				57.9429
										4	12.1111				28.2689
										5	16.4151				35.3319
		tert-/-	3 month-old	1	7.22877			tert-/-	6-9 month-old	1	35.4314
				2	4.94189					2	21.1498
				2	5.92712					2	19.1087
