# Supplementary material for: Opposing p53 and mTOR/AKT promote an in vivo switch from apoptosis to senescence upon telomere shortening in zebrafish
Source: eLife. 2020 May 19;9:e54935. doi: 10.7554/eLife.54935 (PMC7237213; doi:10.7554/eLife.54935)
Supplement: Figure 2—source data 1. [file elife-54935-fig2-data1.xlsx]

## Sheet: Foglio1
	WB quantification GUT extract
	Quantified band intensity using Image J and normalized on Loading Control
		3 month-old							9month-old
	TISSUE	GENOTYPE	AGE	FISH	H2A.X-P	p53	p15/16	TISSUE	GENOTYPE	AGE	FISH	H2A.X-P	p53	p15/16
	GUT	WT	3 month-old	1	0.525731	0.0460317	0.767555	GUT	WT	9month-old	1	0.0962663	0.089661	0.728333
				2	0.111916	0.0572197	1.31979				2	0.10228	0.475513	0.598465
				3	0.35377	0.672405	0.819838				3	0.205061	0.391514	0.478799
				4	0.511255	0.373562	1.51277				4	0.268278	0.697351	0.328039
				5	0.0589282	0.296394	0.792315				5	0.846185	0.152983	0.744465
				6	0.136491	0.330046	0.713938				6	0.836915	0.206851	0.80831
				7	0.407699	0.170232	0.354125				7	0.914632	0.207304	0.642055
				8	0.0805441	0.463004	0.494934							0.322131
				9	1.20553	0.731317	1.04279							0.350516
				10	0.691257	0.0329665	0.4438							0.351457
				11	0.55971	0.652016	0.230251
				12	0.210219	0.469834	0.414551
				13	1.1684	0.822961
				14	0.296846
					H2A.X-P	p53	p15/16					H2A.X-P	p53	p15/16
		tert-/-	3 month-old	1	5.85243	0.43838	0.761611		tert-/-	9month-old	1	0.176017	0.540802	0.783338
				2	0.504934	0.869543	0.911408				2	3.28219	0.598804	0.981964
				3	0.323505	0.201133	0.886335				3	0.220233	0.27041	0.506515
				4	0.270991	1.28077	1.51609				4	0.770354	0.318135	0.545893
				5	0.726623	0.767289	0.593418				5	0.647367	0.275952	0.965783
				6	1.30231	0.774662	0.397582				6	0.220372	0.601831	0.682566
				7	0.345058	1.09118	2.63585				7	0.431751	0.498106	0.753892
				8	0.519431	1.05267	2.03121				8	0.108173	1.09956	0.545599
				9	0.227015	0.901928	0.90512				9	0.69473	0.730019	0.814279
				10	1.40204	1.01234	0.803774				10	1.00485		0.700406
				11	1.41301	0.516321	0.481625				11	1.05706		0.396973
				12	1.43291	1.33294	0.678187				12	0.816221
				13	1.71853	0.239648	1.13727
				14	1.66391
				15	0.400181
	WB quantification TESTIS extract
	Quantified band intensity using Image J and normalized on Loading Control
		3 month-old							9month-old
	TISSUE	GENOTYPE	AGE	FISH	H2A.X-P	p53	p15/16	TISSUE	GENOTYPE	AGE	FISH	H2A.X-P	p53	p15/16
	TESTIS	WT	3 month-old	1	1.56655	0.27191	1.0206	TESTIS	WT	9month-old	1	0.840353	1.69931	0.102401
				2	1.0904	0.789702	1.8027				2	1.74951	1.28269	0.0620764
				3	0.55543	1.0025	2.02208				3	1.11036	1.68869	0.159488
				4	0.751589	0.996875	1.93628				4	1.4486	0.669385	0.124168
				5	0.632543	0.0934926	0.46032				5	1.13303	0.951289	0.123135
				6	0.261779	0.0663383	1.39069				6	0.646926		0.555375
				7	0.282313	0.26522	0.88034				7			0.69626
				8	0.583354	1.29274
					H2A.X-P	p53	p15/16					H2A.X-P	p53	p15/16
		tert-/-	3 month-old	1	3.52196	4.62946	0.513046		tert-/-	9month-old	1	0.256228	1.0155	0.390125
				2	3.45514	2.58449	0.432087				2	0.622077	0.924515	0.197394
				3	1.17449	0.429039	0.990821				3	0.383511	0.644579	0.397069
				4	4.53403	3.30341	0.985167				4	0.373653	3.28471	0.652889
				5	1.02414	0.687601	1.05901				5	0.302374	3.91853	0.639747
				6		2.70783	0.208109				6	1.09322	1.15893	1.09179
				7		2.84814	0.139712				7	1.7236	2.34568	0.346819
				8			0.368808				8	2.2444		1.10243
				9			0.186916							1.09299
				10			0.338045
