# Supplementary material for: Opposing p53 and mTOR/AKT promote an in vivo switch from apoptosis to senescence upon telomere shortening in zebrafish
Source: eLife. 2020 May 19;9:e54935. doi: 10.7554/eLife.54935 (PMC7237213; doi:10.7554/eLife.54935)
Supplement: Figure 2—source data 2. [file elife-54935-fig2-data2.xlsx]

## Sheet: Feuil1
	Figure 2C- source data
	real-time qPCR data for p15/16 mRNA expression
	p15/16 mRNA expression (normalized by RPL13a and WT mean)
	GUT 3 month-old		Testis 3 month-old		GUT 9 month-old		Testis 9 month-old
	WT	tert-/-	WT	tert-/-	WT	tert-/-	WT	tert-/-
	0.359865	1.5139	0.821463	0.659073	0.0685376	30.4253	0.835647	1.2098
	0.757714	5.3595	1.1683	1.79282	1.0748	57.3302	1.07147	2.63827
	1.18633	2.16336	1.04198	1.38209	1.93728	29.4997	1.05553	1.21673
	1.04514	0.818272	1.69145	1.33651	0.292697	16.0134	1.05809	3.10531
	0.776444	2.1205	0.906259	1.894	3.4165	34.0297
	1.03875	0.565938	0.650119	2.05943		3.96797
			1.00345			5.95535
	p21 mRNA expression (normalized by RPL13a and WT mean)
	GUT 3 month-old		Testis 3 month-old		GUT 9 month-old		Testis 9 month-old
	WT	tert-/-	WT	tert-/-	WT	tert-/-	WT	tert-/-
	0.990909	0.319305	0.87941	0.837598	0.851074	7.76151	1.40947	4.79659
	0.662363	0.860481	0.676781	1.99642	0.303794	31.1926	0.619653	3.53275
	1.5236	0.938249	1.6802	1.56276	0.996641	39.0615	1.11578	2.71673
	0.695677	0.642561	1.73074	2.14288	0.538999	10.7268	1.02616	4.6626
	1.13286	1.16631	1.15592	1.51436	1.85529	11.6056
	0.931355	0.668674	0.663164	1.33681		2.00247
	1.36239		0.753737	1.32127		3.2377
