# Supplementary material for: Opposing p53 and mTOR/AKT promote an in vivo switch from apoptosis to senescence upon telomere shortening in zebrafish
Source: eLife. 2020 May 19;9:e54935. doi: 10.7554/eLife.54935 (PMC7237213; doi:10.7554/eLife.54935)
Supplement: Figure 3—figure supplement 1—source data 1. [file elife-54935-fig3-figsupp1-data1.xlsx]

## Sheet: Foglio1
	real-time qPCR PGC1a normalized on RPL13
		3 month-old							9month-old
	TISSUE	GENOTYPE	AGE	FISH	DCT			TISSUE	GENOTYPE	AGE	FISH	DCT
	GUT	WT	3 month-old	1	0.020895			GUT	WT	9month-old	1	0.00348
				2	0.012808						2	0.017568
				3	0.00607						3	0.006632
		tert-/-	3 month-old	1	0.007048				tert-/-	9month-old	1	0.015226
				2	0.011194						2	0.007629
				2	0.014964						2	0.007923
