# Supplementary material for: Opposing p53 and mTOR/AKT promote an in vivo switch from apoptosis to senescence upon telomere shortening in zebrafish
Source: eLife. 2020 May 19;9:e54935. doi: 10.7554/eLife.54935 (PMC7237213; doi:10.7554/eLife.54935)
Supplement: Figure 3—source data 1. [file elife-54935-fig3-data1.xlsx]

## Sheet: Feuil1
	ROS level measurements:
		GUT
	Age (month)	WT			tert-/-
	3	109.726	105.375	97.6538	104.385	119.837	98.8374
	6	129.719	103.163	67.118	154.806	189.386	168.108
	9	92.291	117.282	100.427	193.464	198.093	186.13
		TESTIS
	Age (month)	WT			tert-/-
	3	102.736	71.8374	84.8475	106.893	117.947	126.358
	6	96.3126	77.3297	126.358	203.934	200.799	189.267
	9	104.377	81.3623	94.2611	204.342	251	192.474
	ATP level measurements:
		GUT
	Age (month)	WT			tert-/-
	3	97.5481	93.4112	109.041	87.6699	95.3829	81.6775
	6	118.538	96.2656	85.2128	71.7663	79.4039	87.3746
	9	106	111	120	55.1644	45.1296	57.6699
		TESTIS
	Age (month)	WT			tert-/-
	3	97.5481	93.4112	109.041	81.7417	79.6668	86.8743
	6	118.538	96.2656	85.2128	63.6005	41.4089	51.6937
	9	106.961	110.486	116.247	27.3563	30.1973	45.2454
