# Supplementary material for: Opposing p53 and mTOR/AKT promote an in vivo switch from apoptosis to senescence upon telomere shortening in zebrafish
Source: eLife. 2020 May 19;9:e54935. doi: 10.7554/eLife.54935 (PMC7237213; doi:10.7554/eLife.54935)
Supplement: Figure 4—source data 1. [file elife-54935-fig4-data1.xlsx]

## Sheet: Foglio1
	WB quantification GUT extract Figure 4A
	Quantified band intensity using Image J and normalized on Loading Control
		9 month-old
	TISSUE	GENOTYPE	AGE	FISH	AKT-P	FoXO-1	FoXO-4	SOD2
	GUT	WT	9 month-old	1	0.163477	0.132141	1.00397	1
				2	0.325574	0.122986	0.410619	0.837242
				3	0.0432461	0.221722	0.26929	0.356208
				4	0.0451295	2.3478	0.260764	0.148236
				5	0.0312986	1.05553	0.250791	0.303529
				6	0.0114787	0.666507	0.0732687	0.361321
				7	0.0868326	1.78926	0.0928117	0.634135
				8	0.0591687	0.47999	0.067281	0.891327
				9	0.046797			0.805305
				10	0.0262808			3.8122
				11	0.161255
				12	0.295008
				13	0.248443
				14	0.81261
				15	0.521537
				16	0.40488
					AKT-P	FoXO-1	FoXO-4	SOD2
		tert-/-	9 month-old	1	1.38781	0.494127	0.951946	0.0264172
				2	0.265161	4.95282	0.511302	0.142885
				3	1.37926	3.64312	0.522157	0.0723011
				4	0.0472169	3.14633	0.826161	0.173913
				5	0.0293839	3.30317	0.52502	0.180561
				6	0.441237	4.43925	0.446898	0.0802367
				7	0.0500528	2.5094	0.214908	0.514948
				8	0.354341	0.980248	1.44307	0.412479
				9	0.0205616		1.32258	0.420693
				10	0.243383		0.471652	0.289627
				11	0.470893			0.289985
				12	0.784407
				13	0.766985
				14	0.461098
				15	0.709542
				16	0.619169
				17	0.624381
				18	0.762994
