# Supplementary material for: Opposing p53 and mTOR/AKT promote an in vivo switch from apoptosis to senescence upon telomere shortening in zebrafish
Source: eLife. 2020 May 19;9:e54935. doi: 10.7554/eLife.54935 (PMC7237213; doi:10.7554/eLife.54935)
Supplement: Figure 4—source data 2. [file elife-54935-fig4-data2.xlsx]

## Sheet: Feuil1
	Mean (nuclear/cytoplasmic) p15/16 fluorescence intensity per cell							Mean (nuclear/cytoplasmic) FoxO1 fluorescence intensity per cell
	WT 1	WT 2	WT 3	tert 1	tert 2			WT 1	WT 2	WT 3	tert 1	tert 2
	1.15452	0.903185	1.1902	1.45152	1.17637			0.878385	0.994771	0.867572	0.773442	0.607048
	1.18213	0.852805	1.21581	1.36414	1.41686			0.920843	0.903016	0.857751	0.715668	0.737169
	1.15631	0.883422	1.04648	1.14975	1.47034			0.902296	0.819181	0.880908	0.999182	0.606602
	1.07683	0.971249	1.17978	1.12608	1.59905			0.842035	0.903274	0.853459	0.883755	0.714576
	1.12469	0.878551	1.42831	1.15515	1.20319			0.879616	0.712796	0.908091	0.873245	0.607398
	1.19152	0.943548	1.14286	1.03469	1.01184			0.858108	0.79445	1.01581	0.800223	0.616674
	1.13994	1.00164	1.12828	1.09858	1.65508			0.874434	1.14971	0.89856	0.771529	0.717218
	1.10016	0.902561	1.24952	1.41838	1.27568			0.873441	0.888927	0.904879	0.76668	0.699675
	1.11797	1.00957	1.38199	1.29914	1.30563			0.867329	0.969104	0.876907	0.739554	0.69924
	0.970008	0.599088	1.06761	1.39128	1.24559			0.938199	0.668301	0.924126	0.694137	0.777464
	1.23662	1.10326	1.13951	1.39201	1.33168			0.907741	0.796109	0.988276	0.729398	0.771161
	0.976147	0.938787	1.06872	0.864876	1.16453			0.918867	0.737468	0.982813	0.845448	0.685179
	1.22254	0.823902	0.960864	1.33841	1.2062			0.886332	0.754484	0.956919	0.709959	0.653635
	1.18466	0.946945	1.13952	1.40712	0.939015			0.804088	0.876748	1.0256	0.700627	0.993358
	1.13781	1.50601	1.08418	1.41407	1.37353			0.855852	0.893761	1.00087	0.73542	0.789101
	1.01133	0.888527	1.26042	1.48422	1.37671			0.841427	0.765058	0.932325	0.744403	0.755408
	0.925696	1.15645	1.13673	1.22973	1.39524			0.800879	0.930849	0.913858	0.871903	0.680351
	0.939937	1.01073	1.22686	1.36608	1.31684			0.894548	0.703271	1.14759	0.777471	0.735621
	0.907759	1.07906	1.39149	1.07112	1.53074			0.823453	0.793224	0.86072	0.822318	0.699319
	1.14807	0.980009	1.29718	1.37041	1.23257			0.848183	0.869068	0.980882	0.795138	0.687692
		0.942236	1.44604	1.1518					0.752667	0.785103	0.840384
		1.05187		1.194					1.0445		0.784134
		0.960934		1.22011					0.935096		0.937919
		1.11614		1.26511					1.03407		0.774436
		1.0345		1.44465					0.913933		0.696766
		1.03846		1.65696					0.756616		0.783446
		1.06635		1.50282					0.97545		0.705058
		0.796878		1.35518					0.793751		0.757551
				1.2004							0.843094
				1.0822							0.803316
				0.995436							0.789072
				1.21647							0.68834
				1.35051							0.734782
				1.33463							0.798385
				1.34167							0.735147
				1.18499							0.734256
				1.29546							0.70953
				1.16397							0.683356
				1.19119							0.825832
				1.23744							0.674062
				1.18558							0.746
				0.964223							0.816249
				1.33429							0.716372
				1.32371							0.722437
				1.63455							0.741671
				1.41333							0.830082
				1.66911							0.688961
				1.45253							0.629379
				1.26263							0.616703
				0.969179							0.922759
				1.21761							0.743884
				1.67351							0.772611
				1.41195							0.725408
				1.03208							0.763955
				1.62722							0.785964
				1.50293							0.700353
				1.12486							0.786787
				0.815877							0.634854
				1.25878							0.744691
				0.812068							0.920426
