# Supplementary material for: Opposing p53 and mTOR/AKT promote an in vivo switch from apoptosis to senescence upon telomere shortening in zebrafish
Source: eLife. 2020 May 19;9:e54935. doi: 10.7554/eLife.54935 (PMC7237213; doi:10.7554/eLife.54935)
Supplement: Figure 4—source data 3. [file elife-54935-fig4-data3.xlsx]

## Sheet: Feuil1
		Mean (nuclear/cytoplasmic) p15/16 fluorescence intensity per fish
		WT	Tert
		1.095	1.275
		0.9781	1.311
		1.199
		Mean (nuclear/cytoplasmic) FoxO1 fluorescence intensity per fish
		WT	Tert
		0.8708	0.7676
		0.8618	0.7117
		0.9316
