# Supplementary material for: Opposing p53 and mTOR/AKT promote an in vivo switch from apoptosis to senescence upon telomere shortening in zebrafish
Source: eLife. 2020 May 19;9:e54935. doi: 10.7554/eLife.54935 (PMC7237213; doi:10.7554/eLife.54935)
Supplement: Figure 4—source data 4. [file elife-54935-fig4-data4.xlsx]

## Sheet: Foglio1
	WB quantification extract Figure 4- figure supplement 2 and 3
	Quantified band intensity using Image J and normalized on Loading Control
	Figure 4- figure supplement 1- source data									Figure 4- figure supplement 2- source data
		9 month-old									3 month-old
	TISSUE	GENOTYPE	AGE	FISH	AKT-P	SOD2				TISSUE	GENOTYPE	AGE	FISH	AKT-P	SOD2
	TESTIS	WT	9 month-old	1	0.147624	1.0747				GUT	WT	3 month-old	1	0.585685	0.473707
				2	0.0822408	1.29805							2	0.258943	0.77094
				3	0.119891	2.04084							3	0.553844	0.780454
				4	0.0306304	0.157416							4	1.13644	0.144405
				5	0.0375076	0.408434							5	0.823747	0.149519
				6	0.0368198	0.912015							6	0.632895	0.274525
				7	0.577403	0.967876							7	3.04144	1.15496
				8	0.495244	2.13559							8	1.03139	0.858523
				9	0.320805	1.97045							9	0.928397	1.14939
				10	0.577403	2.90937							10	1.2743	0.47558
				11	0.495244	3.13057							11	1.16862	0.649092
				12	0.320805	7.48527							12	1.45993	0.72147
				13	0.323238	7.5775							13	0.304006	0.0901708
				14	0.083059	0.480201							14	0.312138	0.10096
				15	0.0551649	0.292748							15	0.457406	0.0883518
				16	0.287083	0.826683							16	0.252935	0.129019
				17	1.08282	2.41988							17	0.267305	0.109864
														0.141579	0.116435
					AKT-P	SOD2								AKT-P	SOD2
	TESTIS	tert-/-	9 month-old	1	0.722241	0.373186					tert-/-	3 month-old	1	0.0515651	0.495064
				2	0.0993392	0.594027				GUT			2	0.784054	0.859851
				3	0.38379	0.109952							3	0.63038	0.751738
				4	0.37048	0.124835							4	0.225905	0.578383
				5	0.082364	0.190425							5	1.03161	1.09089
				6	0.477706	0.337546							6	0.795429	0.791087
				7	2.59329	0.467955							7	0.399501	1.0858
				8	0.52609	0.98898							8	1.61277	1.6587
				9	0.594239	0.81194							9	1.02173	0.585566
				10	2.59329	0.566451							10	0.179434	0.517435
				11	0.52609	0.36688							11	0.47698	0.849815
				12	0.594239	0.28853							12	0.217242	0.520756
				13	1.69951	1.28703							13	0.127702	0.116414
				14	0.61398	1.94434							14	0.448382	0.0929366
				15	0.542295	1.69443							15	0.249162	0.0739617
				16	1.74188	0.5959							16	0.235414	0.0731861
				17	1.73062	0.439135							17	0.381501	0.116868
						0.251368								0.230575	0.0753319
