# Supplementary material for: Opposing p53 and mTOR/AKT promote an in vivo switch from apoptosis to senescence upon telomere shortening in zebrafish
Source: eLife. 2020 May 19;9:e54935. doi: 10.7554/eLife.54935 (PMC7237213; doi:10.7554/eLife.54935)
Supplement: Figure 5—source data 1. [file elife-54935-fig5-data1.xlsx]

## Sheet: Feuil1
	ROS level measurements:
	TESTIS
	WT	tert-/-	p53-/-	tert-/-, p53-/-
	109.564	145.375	114.342	105.383
	112.303	140.294	111	100.563
	114.302	146.305	102.348	92.4657
