# Supplementary material for: Opposing p53 and mTOR/AKT promote an in vivo switch from apoptosis to senescence upon telomere shortening in zebrafish
Source: eLife. 2020 May 19;9:e54935. doi: 10.7554/eLife.54935 (PMC7237213; doi:10.7554/eLife.54935)
Supplement: Figure 6—source data 1. [file elife-54935-fig6-data1.xlsx]

## Sheet: Feuil1
	Figure 6B- source data
	real-time qPCR data for p15/16 mRNA expression
	p15/16 mRNA expression (normalized by RPL13a and WT mean)
	GUT 13 month-old
	WT	tert-/-	ztor+/-	tert-/-; ztor+/-
	0.807782	8.03192	1.49673	1.97947
	1.33458	10.3437	0.0202687	5.36721
	0.927599	10.6823	0.30383	6.10367
