# Supplementary material for: Opposing p53 and mTOR/AKT promote an in vivo switch from apoptosis to senescence upon telomere shortening in zebrafish
Source: eLife. 2020 May 19;9:e54935. doi: 10.7554/eLife.54935 (PMC7237213; doi:10.7554/eLife.54935)
Supplement: Figure 6—source data 2. [file elife-54935-fig6-data2.xlsx]

## Sheet: Feuil1
	Figure 6D- source data
	real-time qPCR data for p15/16 mRNA expression in G2 larave
	normalize on RPL13
	WT	tert-/- G2
	1.1134	1.417
	0.607	4.12
	1.34	8.665
	1.0124	1.757
	0.367	2.617
	0.561	3.014
	Figure 6J- source data
	p15/16 mRNA expression (normalized by RPL13a)
	WT + DMSO	WT + Akti	G2 tert-/- DMSO	G2 tert-/- + Akti
	0.00060189	0.00216343	0.00168832	0.00085123
	0.00051262	0.00257085	0.00157954	0.00055812
	0.00071324	0.00094239	0.00190423	0.00063638
