# Supplementary material for: Opposing p53 and mTOR/AKT promote an in vivo switch from apoptosis to senescence upon telomere shortening in zebrafish
Source: eLife. 2020 May 19;9:e54935. doi: 10.7554/eLife.54935 (PMC7237213; doi:10.7554/eLife.54935)
Supplement: Figure 6—source data 3. [file elife-54935-fig6-data3.xlsx]

## Sheet: Feuil1
	ROS level measurements:
		WT			G2 tert-/-
	1 dpf	101.214	98.456	92.3463	93.4568	85.4728	92.1232
	2 dpf	90.5893	110.565	97.8032	103.294	98.3729	96.3728
	3 dpf	96.5767	95.4728	92.1232	130.038	152.039	166.492
	4 dpf	98.4736	102.385	88.9483	120.305	110.294	126.895
	6 dpf	87.4876	92.7463	101.627	153.822	137	141.364
	8 dpf	91.4753	98.3726	97.3827	168.071	153.278	145.395
	10 dpf	89.3726	93.2837	110.038	157.494	203.294	178.393
