# Supplementary material for: Opposing p53 and mTOR/AKT promote an in vivo switch from apoptosis to senescence upon telomere shortening in zebrafish
Source: eLife. 2020 May 19;9:e54935. doi: 10.7554/eLife.54935 (PMC7237213; doi:10.7554/eLife.54935)
Supplement: Figure 6—source data 4. [file elife-54935-fig6-data4.xlsx]

## Sheet: Feuil1
	Survival analysis upon NAC treatment
	Days	WT	tert-/-	WT + NAC	tert-/- + NAC
	11	1
	11	1
	11	0
	11	0
	11	0
	11	0
	11	0
	11	0
	11	0
	11	0
	11	0
	11	0
	11	0
	11	0
	11	0
	11	0
	11	0
	6		1
	7		1
	7		1
	7		1
	7		1
	7		1
	10		1
	11		1
	11		1
	11		0
	11		0
	11		0
	11		0
	11		0
	10			1
	11			1
	11			1
	11			1
	11			0
	11			0
	11			0
	11			0
	11			0
	11			0
	11			0
	11			0
	11			0
	11			0
	11			0
	11			0
	6				1
	8				1
	8				1
	9				1
	9				1
	10				1
	10				1
	11				1
	11				0
	11				0
	11				0
	11				0
	11				0
	11				0
	11				0
	11				0
	11				0
	11				0
	5		1
	6		1
	6		1
	6		1
	6		1
	6		1
	6		1
	6		1
	6		1
	6		1
	7		1
	7		1
	7		1
	8		1
	8		1
	9		1
	9		1
	9		1
	9		1
	10		1
	10		1
	10		1
	10		1
	10		1
	11		1
	11		1
	11		0
	11		0
	10	1
	10	1
	11	1
	11	1
	11	1
	11	0
	11	0
	11	0
	11	0
	11	0
	11	0
	11	0
	11	0
	11	0
	5		1
	6		1
	6		1
	6		1
	6		1
	6		1
	7		1
	7		1
	7		1
	8		1
	9		1
	11		1
	11		1
	11		1
	11		1
	11		0
	11		0
	11		0
	11		0
	11			1
	11			1
	11			1
	11			0
	11			0
	11			0
	11			0
	11			0
	11			0
	11			0
	11			0
	5				1
	6				1
	6				1
	6				1
	6				1
	10				1
	10				1
	10				1
	11				1
	11				1
	11				0
	11				0
	11				0
	11				0
	11				0
	11				0
	11				0
	11				0
